# Supplementary material for: Three-tiered score for Ki-67 and p16ink4a improves accuracy and reproducibility of grading CIN lesions
Source: PubMed Central journal article supplement — J Clin Pathol. 2018 Jul 16;71(11):981–8. doi: 10.1136/jclinpath-2018-205271 (PMC6225805; doi:10.1136/jclinpath-2018-205271), 2018-07-16

Supplementary Table 1 | **Accuracy of different test strategies.**

The pooled proportions of test positives from the different CIN grading strategies with positivity definitions I to VII are shown separately for each *Reference Standard* category (i.e., *no dysplasia*, *cervical intraepithelial neoplasia (CIN) 1*, *CIN2*, *CIN3* and *cervical squamous cell carcinoma (SCC)*). A proportion of 1.0 represents 100% accuracy for identification of the *Reference Standard*, whereas a proportion of 0.0 represents 0% accuracy for identification of the *Reference Standard*.

|                                   | No dysplasia (n=35)<br>Proportion | CIN1 (n=19)<br>Proportion | CIN2 (n=17)<br>Proportion | CIN3 (n=22)<br>Proportion | SCC (n=22)<br>Proportion |
|-----------------------------------|-----------------------------------|---------------------------|---------------------------|---------------------------|--------------------------|
| 1. H&E score CIN2+ vs <CIN2       | 0.019                             | 0.193                     | 0.765                     | 0.970                     | 1.000                    |
| 2. H&E score CIN3+ vs <CIN3       | 0.010                             | 0.053                     | 0.275                     | 0.818                     | 1.000                    |
| 3. H&E + IHC score CIN2+ vs <CIN2 | 0.010                             | 0.175                     | 0.863                     | 0.985                     | 1.000                    |
| 4. H&E + IHC score CIN3+ vs <CIN3 | 0.000                             | 0.018                     | 0.314                     | 0.848                     | 1.000                    |
| 5. Immunoscore 4+ vs <4           | 0.019                             | 0.281                     | 0.902                     | 1.000                     | 1.000                    |
| 6. Immunoscore 5+ vs <5           | 0.019                             | 0.158                     | 0.824                     | 0.985                     | 1.000                    |
| 7. Immunoscore 6 vs <6            | 0.010                             | 0.018                     | 0.549                     | 0.955                     | 0.985                    |

Supplementary Table 2 | **Differences in proportions of test positives between test strategies.**

This table shows the absolute differences between the pooled proportions of test positives of strategies I to VII (all combinations) within each *Reference Standard* category (i.e. *no dysplasia*, *cervical intraepithelial neoplasia (CIN) 1 (a)*, *CIN2 (b)*, *CIN3 (c)* and *cervical squamous cell carcinoma (SCC)*). Within each *Reference Standard* category, we calculated the absolute differences between the pooled proportions of test positives for each combination of CIN grading strategies I to VII with 95% Confidence Intervals (95%CI). If a confidence interval did not include the value 0, the difference was considered statistically significant. Significant differences are shown in bold and partly shown in Figure 4 by  $\Delta$ .

For example, within *Reference Standard CIN2*, the pooled proportion of test positives for strategy I is 0.765 (see Supplementary Table 1). The pooled proportion of test positives for strategy VII is 0.549. The significant difference in positivity between these strategies is  $0.765 - 0.549 = 0.216$  (95%CI 0.06 – 0.372). This number corresponds to the  $\Delta 0.216^*$  shown Figure 4.

Within Reference Standard no dysplasia and SCC, none of the differences were significant and data are not shown.

a) Reference Standard CIN1

|                          | 1. H&E score CIN2+<br>Difference (95%CI) | 2. H&E score CIN3+<br>Difference (95%CI) | 3. H&E + IHC score CIN2+<br>Difference (95%CI) | 4. H&E + IHC score CIN3+<br>Difference (95%CI) | 5. Immunoscore 4+<br>Difference (95%CI) | 6. Immunoscore 5+<br>Difference (95%CI) |
|--------------------------|------------------------------------------|------------------------------------------|------------------------------------------------|------------------------------------------------|-----------------------------------------|-----------------------------------------|
| 1. H&E score CIN2+       | -                                        | -                                        | -                                              | -                                              | -                                       | -                                       |
| 2. H&E score CIN3+       | <b>0.140 ( 0.033 - 0.248 )</b>           | -                                        | -                                              | -                                              | -                                       | -                                       |
| 3. H&E + IHC score CIN2+ | 0.018 ( -0.091 - 0.126 )                 | <b>0.123 ( 0.007 - 0.238 )</b>           | -                                              | -                                              | -                                       | -                                       |
| 4. H&E + IHC score CIN3+ | <b>0.175 ( 0.059 - 0.292 )</b>           | 0.035 ( -0.030 - 0.100 )                 | <b>0.158 ( 0.046 - 0.270 )</b>                 | -                                              | -                                       | -                                       |
| 5. Immunoscore 4+        | 0.088 ( -0.100 - 0.276 )                 | <b>0.228 ( 0.091 - 0.365 )</b>           | 0.105 ( -0.239 - 0.028 )                       | <b>0.263 ( 0.131 - 0.395 )</b>                 | -                                       | -                                       |
| 6. Immunoscore 5+        | 0.035 ( -0.101 - 0.171 )                 | 0.105 ( -0.216 - 0.006 )                 | 0.018 ( -0.103 - 0.138 )                       | <b>0.140 ( 0.033 - 0.248 )</b>                 | <b>0.123 ( 0.020 - 0.226 )</b>          | -                                       |
| 7. Immunoscore 6         | <b>0.175 ( 0.059 - 0.292 )</b>           | 0.035 ( -0.030 - 0.100 )                 | <b>0.158 ( 0.046 - 0.270 )</b>                 | 0.000 ( -0.018 - 0.018 )                       | <b>0.263 ( 0.131 - 0.395 )</b>          | <b>0.140 ( 0.033 - 0.248 )</b>          |

b) Reference Standard CIN2

|                          | 1. H&E score CIN2+<br>Difference (95%CI) | 2. H&E score CIN3+<br>Difference (95%CI) | 3. H&E + IHC score CIN2+<br>Difference (95%CI) | 4. H&E + IHC score CIN3+<br>Difference (95%CI) | 5. Immunoscore 4+<br>Difference (95%CI) | 6. Immunoscore 5+<br>Difference (95%CI) |
|--------------------------|------------------------------------------|------------------------------------------|------------------------------------------------|------------------------------------------------|-----------------------------------------|-----------------------------------------|
| 1. H&E score CIN2+       | -                                        | -                                        | -                                              | -                                              | -                                       | -                                       |
| 2. H&E score CIN3+       | <b>0.490 ( 0.333 - 0.647 )</b>           | -                                        | -                                              | -                                              | -                                       | -                                       |
| 3. H&E + IHC score CIN2+ | 0.098 ( -0.199 - 0.003 )                 | <b>0.588 ( 0.434 - 0.743 )</b>           | -                                              | -                                              | -                                       | -                                       |
| 4. H&E + IHC score CIN3+ | <b>0.451 ( 0.295 - 0.607 )</b>           | 0.039 ( -0.135 - 0.056 )                 | <b>0.549 ( 0.393 - 0.705 )</b>                 | -                                              | -                                       | -                                       |
| 5. Immunoscore 4+        | 0.137 ( -0.279 - 0.004 )                 | <b>0.627 ( 0.475 - 0.780 )</b>           | 0.039 ( -0.180 - 0.101 )                       | <b>0.590 ( 0.434 - 0.743 )</b>                 | -                                       | -                                       |
| 6. Immunoscore 5+        | 0.059 ( -0.216 - 0.098 )                 | <b>0.549 ( 0.393 - 0.705 )</b>           | 0.039 ( -0.113 - 0.192 )                       | <b>0.510 ( 0.667 - 0.353 )</b>                 | 0.078 ( -0.015 - 0.172 )                | -                                       |
| 7. Immunoscore 6         | <b>0.216 ( 0.060 - 0.372 )</b>           | <b>0.275 ( 0.121 - 0.428 )</b>           | <b>0.314 ( 0.145 - 0.482 )</b>                 | <b>0.235 ( 0.383 - 0.087 )</b>                 | <b>0.353 ( 0.202 - 0.504 )</b>          | <b>0.275 ( 0.132 - 0.417 )</b>          |

c) Reference Standard CIN3

|                          | 1. H&E score CIN2+<br>Difference (95%CI) | 2. H&E score CIN3+<br>Difference (95%CI) | 3. H&E + IHC score CIN2+<br>Difference (95%CI) | 4. H&E + IHC score CIN3+<br>Difference (95%CI) | 5. Immunoscore 4+<br>Difference (95%CI) | 6. Immunoscore 5+<br>Difference (95%CI) |
|--------------------------|------------------------------------------|------------------------------------------|------------------------------------------------|------------------------------------------------|-----------------------------------------|-----------------------------------------|
| 1. H&E score CIN2+       | -                                        | -                                        | -                                              | -                                              | -                                       | -                                       |
| 2. H&E score CIN3+       | <b>0.152 ( 0.050 - 0.253 )</b>           | -                                        | -                                              | -                                              | -                                       | -                                       |
| 3. H&E + IHC score CIN2+ | 0.015 ( -0.060 - 0.029 )                 | <b>0.170 ( 0.062 - 0.272 )</b>           | -                                              | -                                              | -                                       | -                                       |
| 4. H&E + IHC score CIN3+ | <b>0.121 ( 0.027 - 0.215 )</b>           | 0.030 ( -0.087 - 0.026 )                 | <b>0.136 ( 0.038 - 0.234 )</b>                 | -                                              | -                                       | -                                       |
| 5. Immunoscore 4+        | 0.030 ( -0.087 - 0.026 )                 | <b>0.182 ( 0.074 - 0.290 )</b>           | 0.015 ( -0.060 - 0.029 )                       | <b>0.150 ( 0.050 - 0.253 )</b>                 | -                                       | -                                       |
| 6. Immunoscore 5+        | 0.015 ( -0.082 - 0.051 )                 | <b>0.167 ( 0.062 - 0.272 )</b>           | 0.000 ( -0.057 - 0.057 )                       | <b>0.136 ( 0.234 - 0.038 )</b>                 | 0.015 ( -0.029 - 0.060 )                | -                                       |
| 7. Immunoscore 6         | 0.015 ( -0.066 - 0.097 )                 | <b>0.136 ( 0.028 - 0.244 )</b>           | 0.030 ( -0.044 - 0.104 )                       | <b>0.106 ( 0.006 - 0.207 )</b>                 | 0.045 ( -0.020 - 0.111 )                | 0.030 ( -0.026 - 0.087 )                |

Supplementary Table 3 | **Reproducibility of test strategies.**

The average of absolute agreements amongst pathologists for the different CIN grading strategies I to VII are shown separately for each *Reference Standard* category *no dysplasia*, *cervical intraepithelial neoplasia (CIN) 1*, *CIN2*, *CIN3* and *cervical squamous cell carcinoma (SCC)*. An absolute agreement of 1.0 indicates that all pathologists gave the same score (for example, immunoscore 4+ or <4) for each specimen (100% agreement), whereas an absolute agreement of 0 indicates that all pathologists gave a different score for each specimen (0% agreement).

|                                   | No dysplasia (n=35)<br>Absolute Agreement | CIN1 (n=19)<br>Absolute Agreement | CIN2 (n=17)<br>Absolute Agreement | CIN3 (n=22)<br>Absolute Agreement | SCC (n=22)<br>Absolute Agreement |
|-----------------------------------|-------------------------------------------|-----------------------------------|-----------------------------------|-----------------------------------|----------------------------------|
| 1. H&E score CIN2+ vs <CIN2       | 0.962                                     | 0.684                             | 0.804                             | 0.939                             | 1.000                            |
| 2. H&E score CIN3+ vs <CIN3       | 0.981                                     | 0.895                             | 0.451                             | 0.697                             | 1.000                            |
| 3. H&E + IHC score CIN2+ vs <CIN2 | 0.981                                     | 0.649                             | 0.765                             | 0.970                             | 1.000                            |
| 4. H&E + IHC score CIN3+ vs <CIN3 | 1.000                                     | 0.965                             | 0.373                             | 0.727                             | 1.000                            |
| 5. Immunoscore 4+ vs <4           | 0.962                                     | 0.684                             | 0.843                             | 1.000                             | 1.000                            |
| 6. Immunoscore 5+ vs <5           | 0.962                                     | 0.789                             | 0.725                             | 0.970                             | 1.000                            |
| 7. Immunoscore 6 vs <6            | 0.981                                     | 0.965                             | 0.529                             | 0.909                             | 0.970                            |

Supplementary Figure 1 | Accuracy of different CIN grading strategies including single p16<sup>ink4a</sup> scores.

The proportion of test positives for the different CIN grading strategies I to VII are shown separately for each *Reference Standard* category; *no dysplasia*, *cervical intraepithelial neoplasia (CIN) 1, CIN2, CIN3* and *cervical squamous cell carcinoma (SCC)*. The haematoxylin and eosin (H&E) score (I and II) is based solely on morphologic characteristics, the H&E + immunohistochemistry (IHC) score (III and IV) is rendered after interpretation of Ki-67 and p16<sup>ink4a</sup> immunostains, and the single p16<sup>ink4a</sup> score (V, VI and VII) is the value of the scoring for p16<sup>ink4a</sup> immunostains independently scored from H&E staining by the pathologist. The number of sole p16<sup>ink4a</sup> positive lesions (for either strategy V, VI or VII) is relatively high compared to the combined Ki-67 and p16<sup>ink4a</sup> immunoscore.

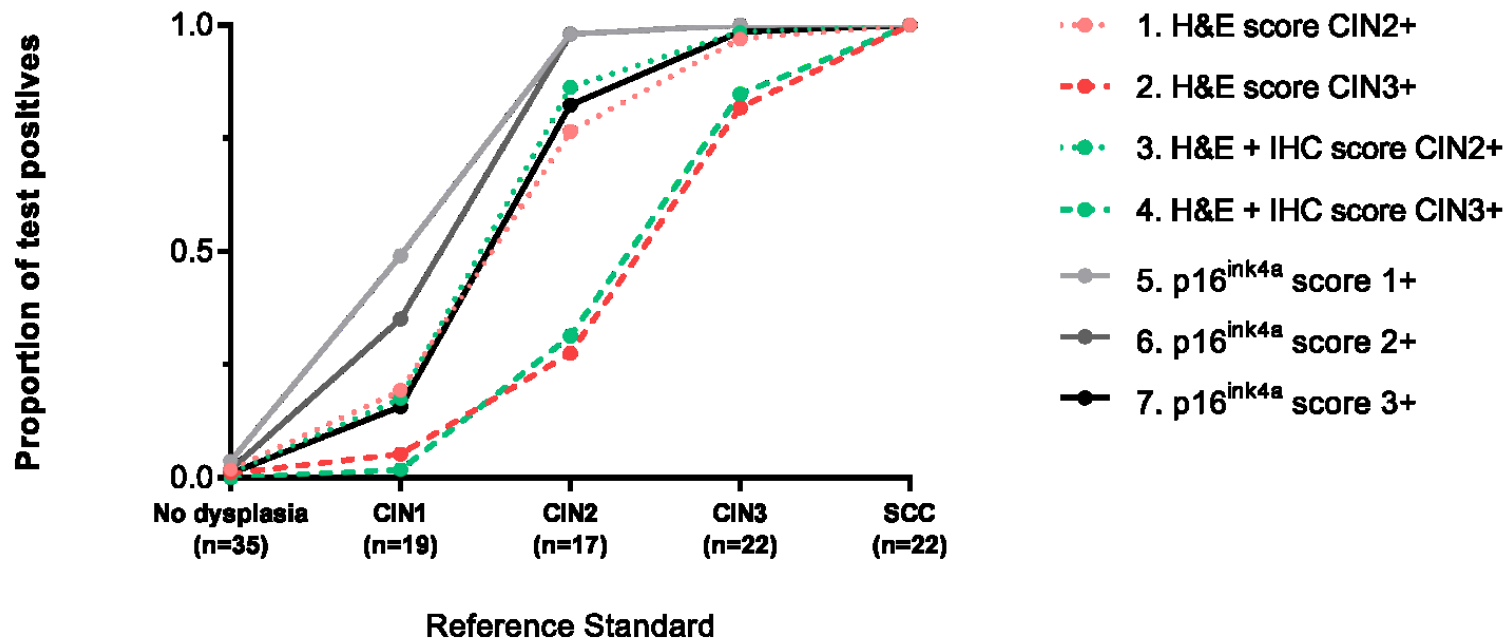

Supplement: jclinpath-2018-205271supp001.pdf [file jclinpath-2018-205271supp001.pdf]
